# Supplementary material for: Enhancement of hydrogen production of a Cu–TiO2nanocomposite photocatalyst combined with broad spectrum absorption sensitizer Erythrosin B
Source: Royal Society of Chemistry journal article supplement (doi:10.1039/c6ra27686e), 2017-01-01
Supplement: c6ra27686e1.pdf [file c6ra27686e1.pdf]

## Supplementary Information

### Enhancement of hydrogen production of Cu-TiO<sub>2</sub> nanocomposite photocatalyst combined with broad spectrum absorption sensitizer Erythrosin B

Piyong Zhang, Ting Song, Tingting Wang, Heping Zeng\*

Key Laboratory of Functional Molecular Engineering of Guangdong Province, School of Chemistry and Chemical Engineering, South China University of Technology, Guangzhou, 510641, P. R. China.

\*Corresponding author. Tel.: +86-20-87112631; Fax: +86-20-87112631; E-mail: hpzeng@scut.edu.cn;

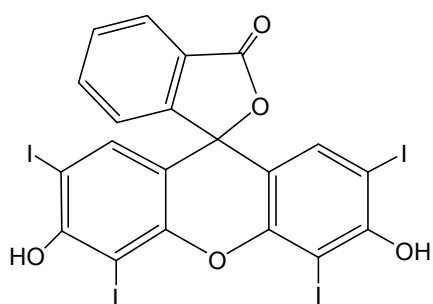

**Figure S1** Structure of Erythrosin B.

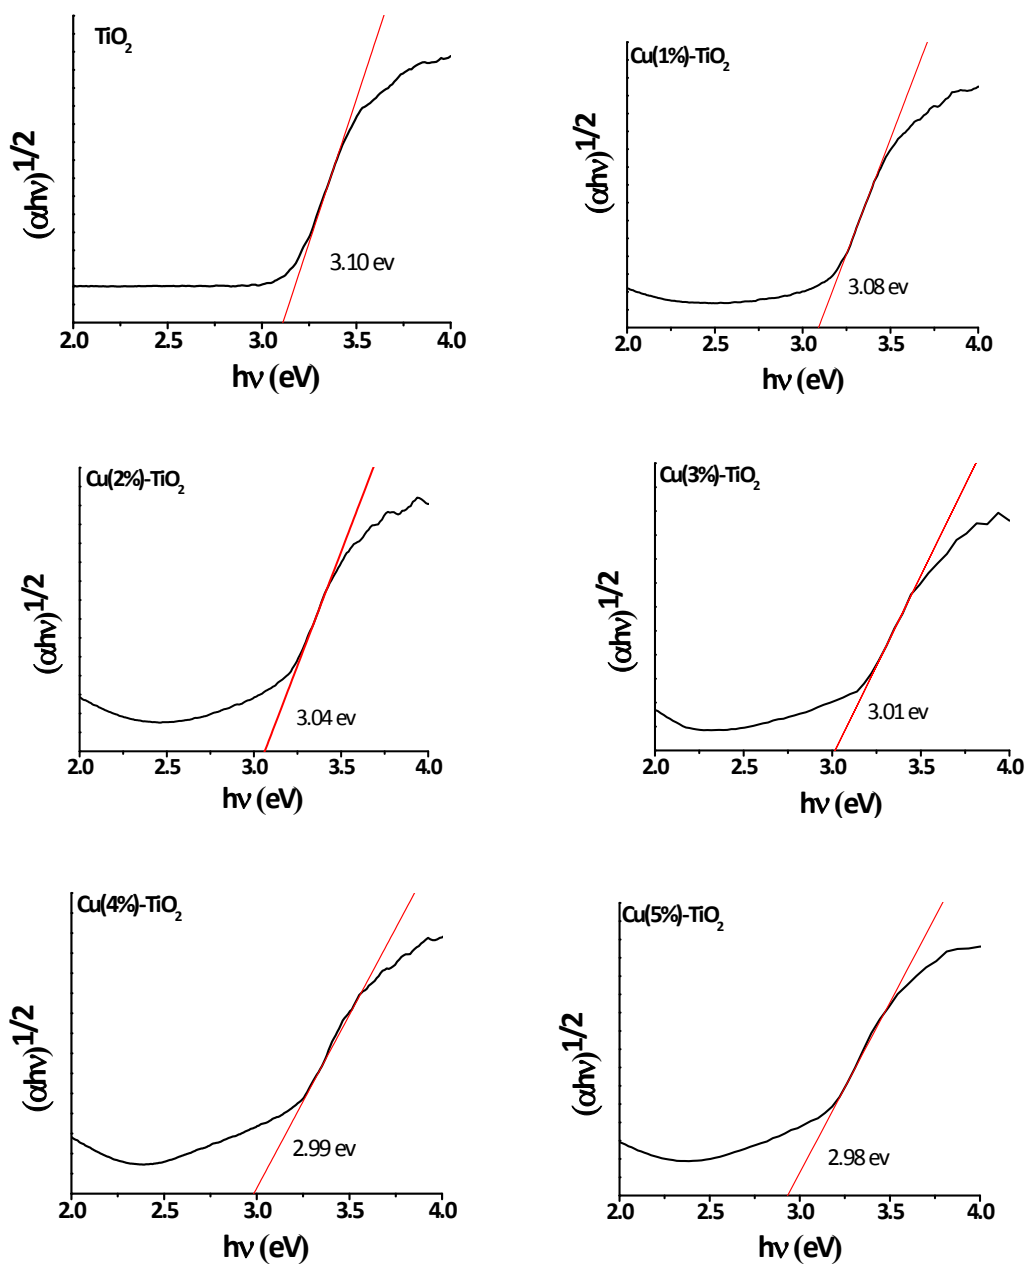

**Figure S2** Tauc plots of pure TiO<sub>2</sub> and Cu-TiO<sub>2</sub> composites with different amounts of Cu.

The band gap can be estimated from the following equation:

$$\alpha hv = A (hv - E_g)^{n/2}$$

where  $\alpha$ ,  $h$ ,  $\nu$ , and  $E_g$  are the absorption coefficient, Planck's constant, light frequency, and band gap, respectively, and  $A$  is a constant. The factor  $n$  depends on the characteristics of the optical transition of a semiconductor ( $n = 1$  for direct transition and  $n = 4$  for indirect transition). After Cu NPs-loaded on TiO<sub>2</sub>, the band

gap values of Cu-TiO<sub>2</sub> show a slight decrease, implying the scope of absorption light is broadened which is consistent with UV-Vis diffuse reflectance spectra.

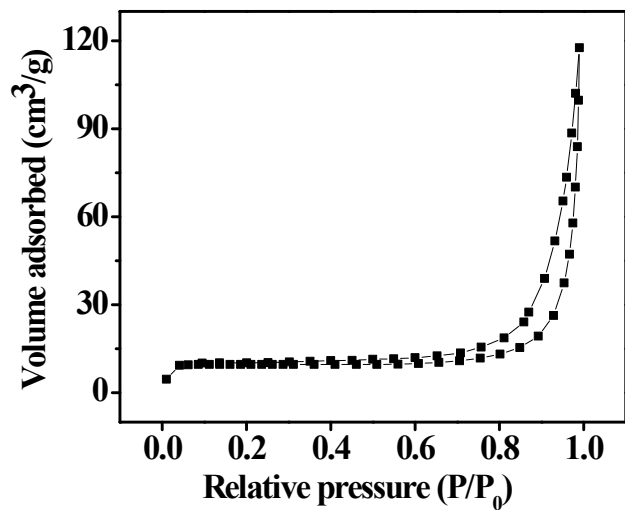

**Figure S3** N<sub>2</sub> adsorption-desorption isotherms for TiO<sub>2</sub>.

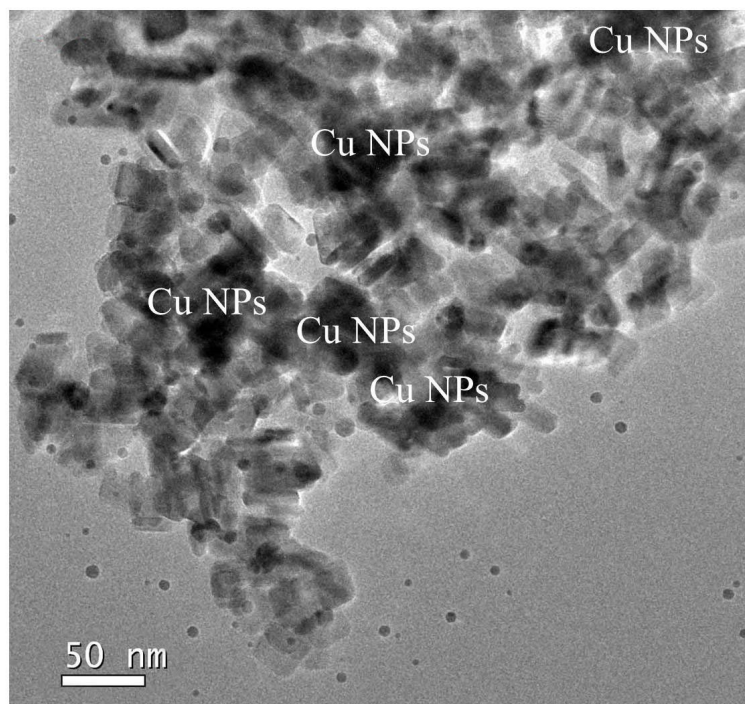

**Figure S4** TEM image of Cu(4%)-TiO<sub>2</sub>.

Dark-field of TEM image (Fig. S4a) indicates that Cu NPs were aggregated.

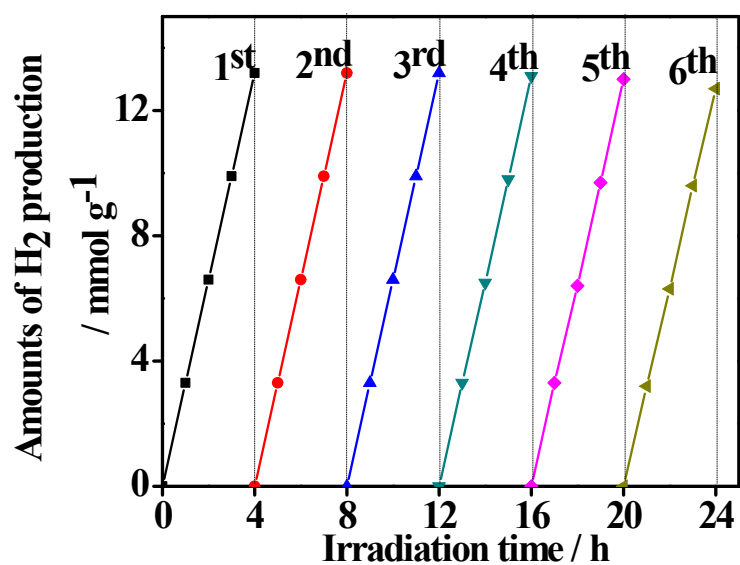

**Figure S5** The cycling test of photocatalytic H<sub>2</sub> production for Cu(3%)-TiO<sub>2</sub> (irradiation time=24 h).

Little deactivation of the catalyst occurs upon repeated use, implying that it exhibits good stability and reusability.

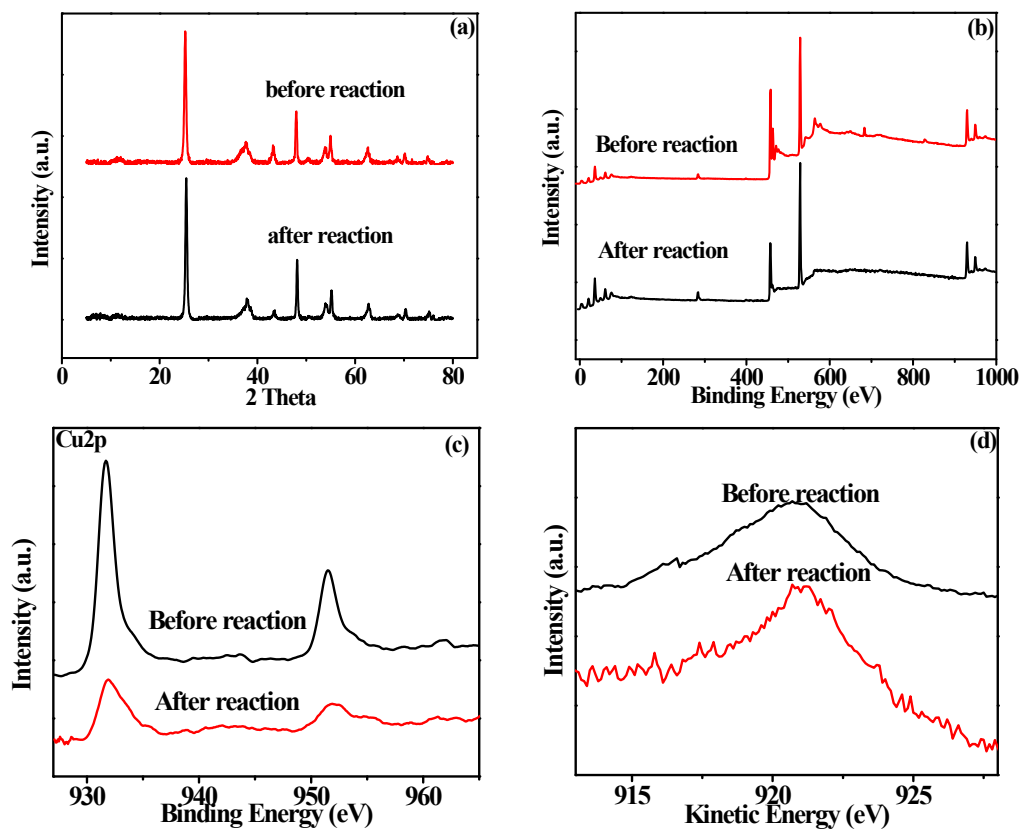

**Figure S6** (a) XRD patterns and XPS spectra of Cu(3%)-TiO<sub>2</sub>, (b) survey spectrum,

(c) Cu2p and (d) Cu LMM before and after the stability test of hydrogen production.

There are no obvious changes in the positions of the peaks, suggesting that it has considerable photostability.

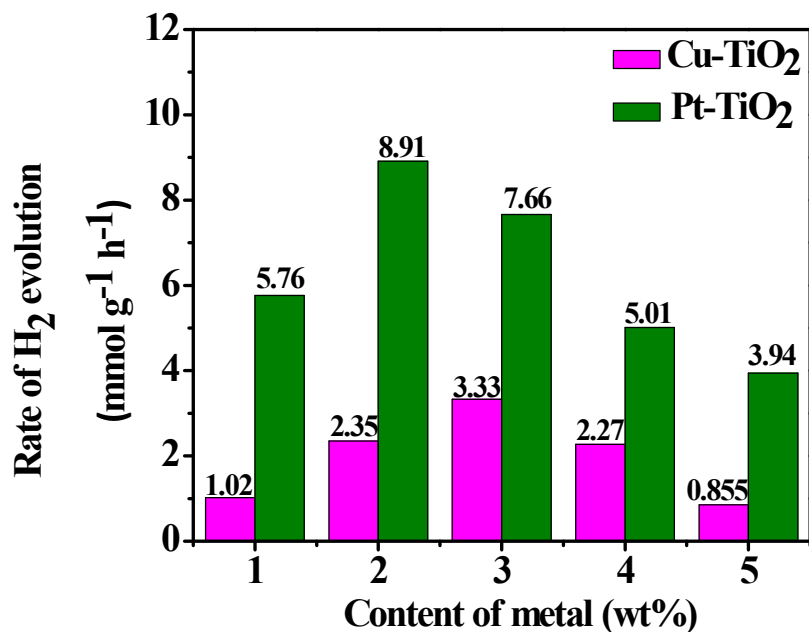

**Figure S7** Photocatalytic H<sub>2</sub> production of Pt-TiO<sub>2</sub> and Cu-TiO<sub>2</sub> with various content of metal.

Pt-TiO<sub>2</sub> nanocomposites were synthesized by deposition-precipitation method, using H<sub>2</sub>PtCl<sub>6</sub> (0.1 g L<sup>-1</sup> of Pt) as Pt source and urea (0.42 M) as the precipitating agent [1]. Other experimental parts are similar to synthesis of Cu-TiO<sub>2</sub>. As shown in Fig. S7, photocatalytic H<sub>2</sub> production of Pt-TiO<sub>2</sub> is better than Cu-TiO<sub>2</sub> at same content of metal and the highest value is 8.91 mmol g<sup>-1</sup> h<sup>-1</sup> for Pt(2wt%)-TiO<sub>2</sub>. However, it still lower than Cu(3%)-TiO<sub>2</sub>/ErB-3mg (13.4 mmol g<sup>-1</sup> h<sup>-1</sup>), indicating that sensitization is an important method for improvement of photocatalytic ability. In addition, Pt is noble metal and its large-scale application would be limited.

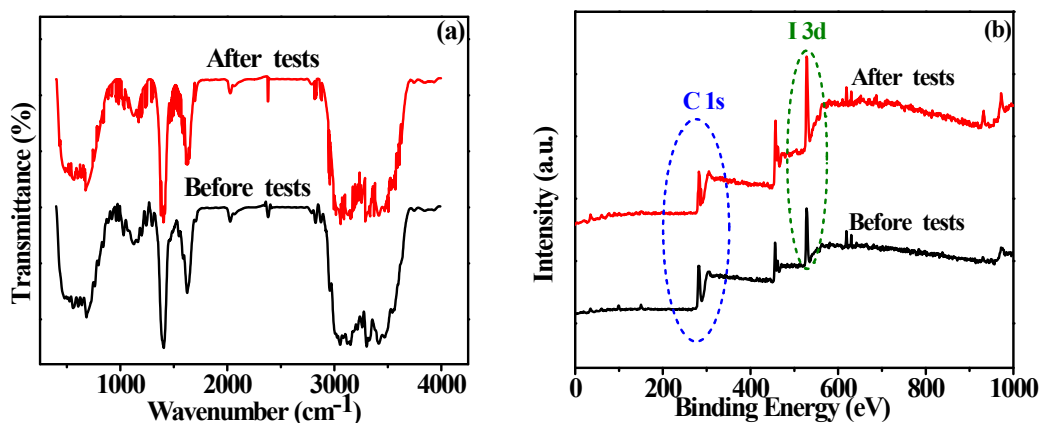

**Figure S8** (a) FTIR spectra and (b) XPS spectra of Cu(3%)-TiO<sub>2</sub>/ErB-3mg before and after cycling tests.

As shown in Fig. S8a, although some impurity peaks are observed, the main peaks of ErB still appear indicating the existence of ErB. Impurity peaks may attribute to fragments of ErB which degraded partly under irradiation. XPS spectra (Fig. S8b) show two new peaks which attribute to C 1s (marked by blue dashed line) and I 3d (marked by green dashed line). The new peaks attach to carbon and iodine elements of ErB.

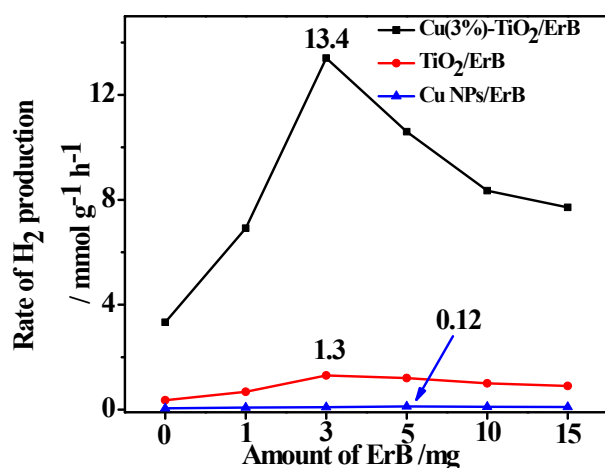

**Figure S9** TiO<sub>2</sub>, Cu NPs and Cu(3%)-TiO<sub>2</sub> photocatalytic H<sub>2</sub> production with sensitization by ErB under solar light irradiation.

Fig. S9 shows H<sub>2</sub> production rate of TiO<sub>2</sub> and Cu NPs sensitized by various amount of ErB. Cu NPs have a weak catalytic hydrogen production ability due to LSPR effect [2] and the rate of H<sub>2</sub> production is only 0.05 mmol g<sup>-1</sup> h<sup>-1</sup>, because electrons that induced by LSPR effect and then provided to H<sup>+</sup> is insufficient. After

sensitization, Cu NPs/ErB H<sub>2</sub> production increases but still keep at low level (0.12 mmol g<sup>-1</sup> h<sup>-1</sup>) due to lack of interaction with TiO<sub>2</sub>. TiO<sub>2</sub> could be excited under solar light irradiation and used as a transfer station to promote electron transfer of photoinduction. In the absence of cocatalyst Cu NPs, H<sub>2</sub> production rate of TiO<sub>2</sub> is also low even sensitized by ErB (1.3 mmol g<sup>-1</sup> h<sup>-1</sup>). This result indicates charge transfer is inhibited without cocatalyst Cu NPs and recombination rate of electron-holes increases. From what have been discussed above, we can find that both single TiO<sub>2</sub> and Cu NPs are low active for H<sub>2</sub> production after sensitized by ErB. Therefore, the existences of TiO<sub>2</sub>, Cu NPs and ErB are important for H<sub>2</sub> production in the catalytic system.

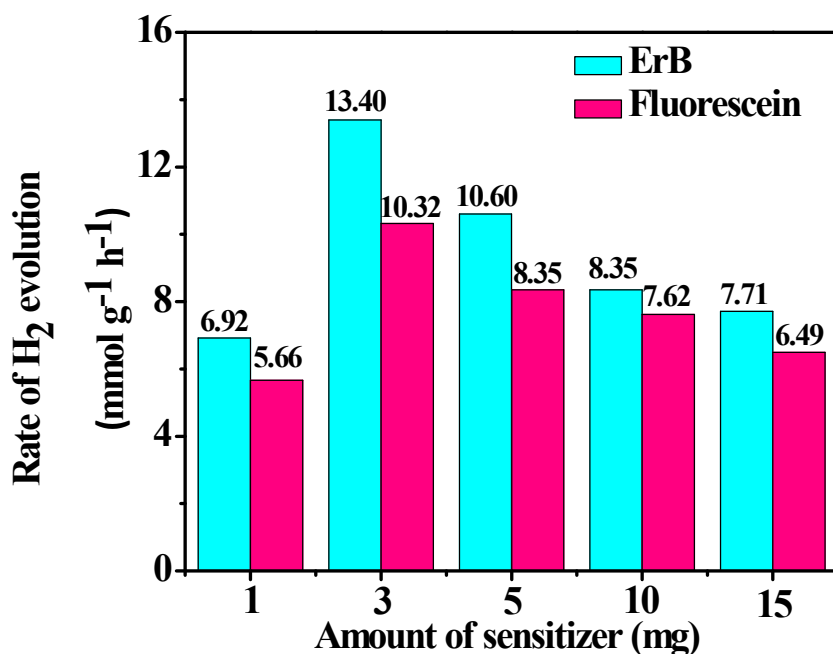

**Figure S10** Photocatalytic H<sub>2</sub> production of Cu-TiO<sub>2</sub> with different sensitizer.

Hydrogen production of fluorescein (Aladdin Chemistry Co. Ltd.) sensitized Cu-TiO<sub>2</sub> was measured similar to ErB system. As shown in Fig. S10, hydrogen production of ErB system is slight higher than fluorescein system due to their different structures. Iodine is possible beneficial for photocatalysis.

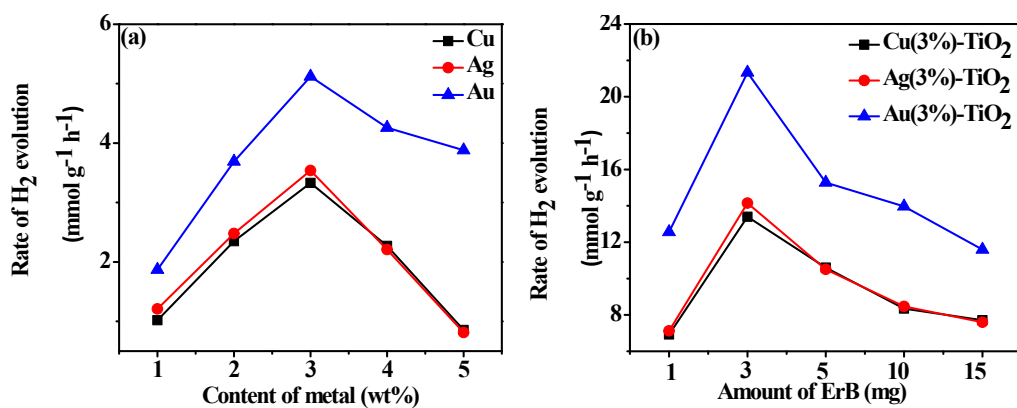

**Figure S11 (a)** Photocatalytic H<sub>2</sub> production of Metal-TiO<sub>2</sub> with various content of metal , **(b)** photocatalytic H<sub>2</sub> production of Metal(3%)-TiO<sub>2</sub> with different amount of ErB.

AgNO<sub>3</sub> and HAuCl<sub>4</sub> (Aladdin Chemistry Co. Ltd.) were used as precursor of metal nanoparticles and NaBH<sub>4</sub> solution was used as reductant. Other experimental sections are similar to synthesis of Cu-TiO<sub>2</sub>. Au-TiO<sub>2</sub> and Ag-TiO<sub>2</sub> sensitization experiments are also similar to Cu-TiO<sub>2</sub>.

As shown in Fig. S11a, photocatalytic H<sub>2</sub> production of Metal-TiO<sub>2</sub> order is Au>Ag≈Cu at the same content of metal and sensitization experimental results show same conclusion (Fig. S11b). In general, Au has the best catalytic effect in these three systems. Cu and Ag have similar catalytic effect. Au and Ag are noble metals and it is unsuitable for large-scale application, however, Cu is suitable for large-scale application in the future which deserves to further research.

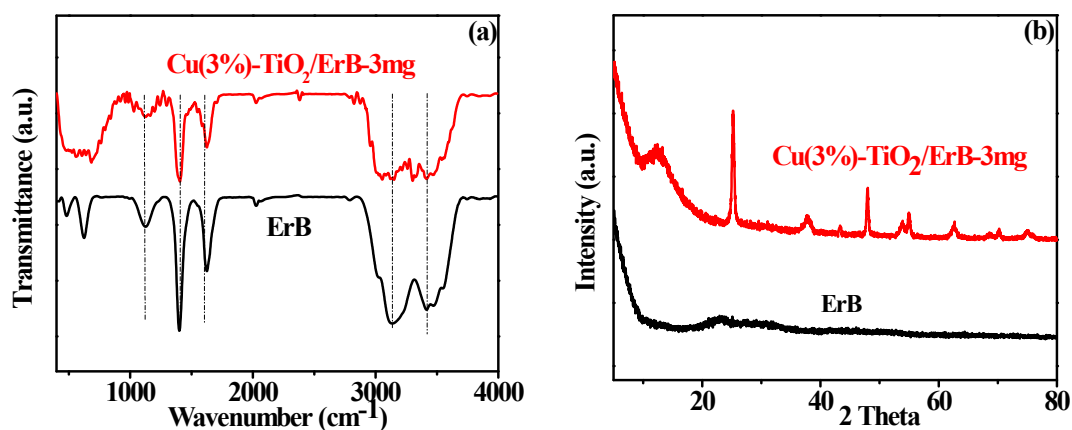



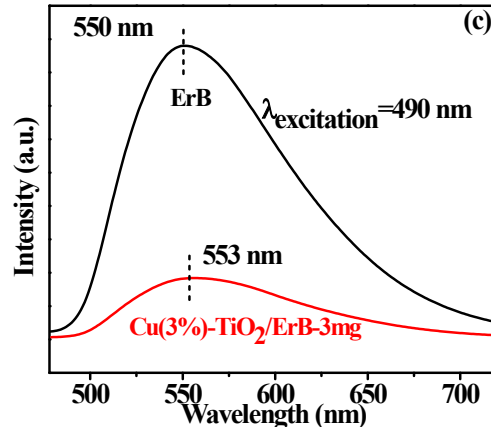

**Figure S12 (a)** FTIR spectra, **(b)** XRD patterns and **(c)** photo-luminescence (PL) spectra of ErB and Cu(3%)-TiO<sub>2</sub>/ErB-3mg.

The Cu(3%)-TiO<sub>2</sub>/ErB-3mg sample was obtained through centrifugation (10,000 rpm, 20 min) of reaction solution (contain 3 mg ErB) after irradiation 5 h. As shown in Fig. S12a, the FTIR spectra of ErB and Cu(3%)-TiO<sub>2</sub>/ErB-3mg are similar from 1000 to 4000 cm<sup>-1</sup> of wavenumber and this can be fully proved that the existence of ErB indicating that ErB dye molecules were absorbed on surface of Cu(3%)-TiO<sub>2</sub>. There is a slight difference of peaks shape because of the interactions of ErB and Cu(3%)-TiO<sub>2</sub>. The spectra of Cu(3%)-TiO<sub>2</sub>/ErB-3mg at 400~1000 cm<sup>-1</sup> have many differences due to existence of TiO<sub>2</sub> peaks. XRD patterns of Cu(3%)-TiO<sub>2</sub>/ErB-3mg and ErB are shown in Fig. S12b. There is no obvious peak for ErB because of its amorphous phase. The intensity of peaks about Cu(3%)-TiO<sub>2</sub>/ErB-3mg declines and the peak of Cu at 50.3° has disappeared, which can be attributed to the synergistic interactions of ErB and Cu(3%)-TiO<sub>2</sub>. The photo-luminescence (PL) spectra (Fig. S12c) were investigated to evaluate the charge transfer from ErB to TiO<sub>2</sub>. A strong emission peak at 550 nm is obtained on excitation at 490 nm with ErB, which is attributed to the electrons excitation from HOMO to LUMO of ErB under visible irradiation [3]. After sensitization by ErB, the emission peak exhibits an obvious decrease indicating electron transfer process should be enhanced. It is noteworthy that the peak of Cu(3%)-TiO<sub>2</sub>/ErB-3mg shows small red shift from 550 to 553 nm because of Van Der Waals interactions of ErB and TiO<sub>2</sub> [3-5]. Van Der Waals interactions are very important for electron transfer from excited ErB to TiO<sub>2</sub>. The above discussions

confirm that ErB dye molecules contact and exist synergistic interaction with Cu(3%)-TiO<sub>2</sub> and it is capable to sensitize Cu(3%)-TiO<sub>2</sub> efficiently.

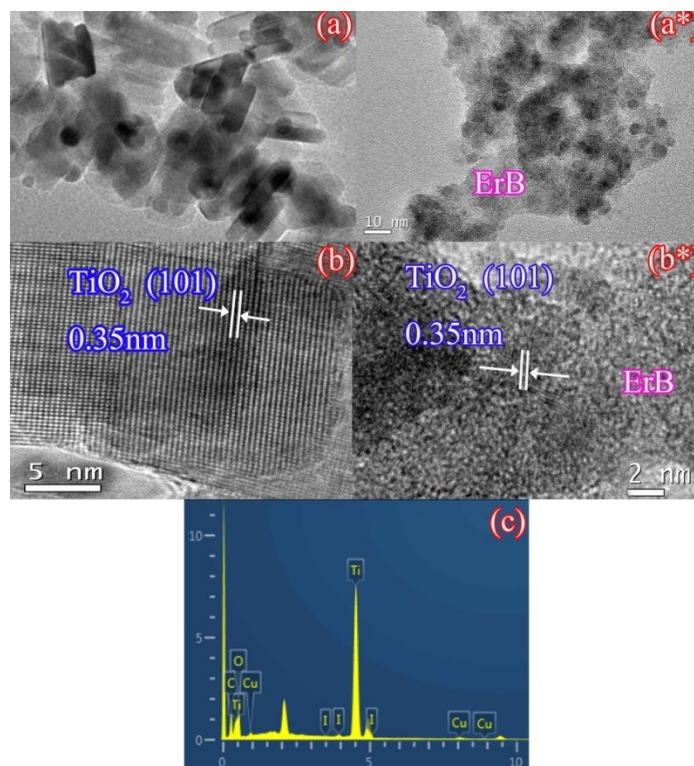

**Figure S13** (a) TEM and (b) HRTEM images of Cu(3%)-TiO<sub>2</sub>; (a\*) TEM, (b\*) HRTEM and (c) EDX spectrum images of Cu(3%)-TiO<sub>2</sub>/ErB-3mg.

The low-magnification TEM image (Fig. S13a) shows the rod morphology of as-synthesized Cu(3%)-TiO<sub>2</sub> composites. After sensitization, the image (Fig. S13a\*) becomes vague and cannot distinguish the shape of TiO<sub>2</sub> because of ErB cover. From the high-resolution TEM (HRTEM) image of Cu(3%)-TiO<sub>2</sub> (Fig. S13b), TiO<sub>2</sub> phase is clearly observed and the interlayer distance of 0.35 nm corresponds well with the lattice spacing of (101) plane of TiO<sub>2</sub>. However, HRTEM image of Cu(3%)-TiO<sub>2</sub>/ErB-3mg (Fig. S13b\*) is also vague and only a few lattices are obtained due to TiO<sub>2</sub> phase. TEM images of Cu(3%)-TiO<sub>2</sub>/ErB-3mg (Fig. S13a\* and Fig. S13b\*) are all vague illustrating that ErB is well absorbed on the surface of TiO<sub>2</sub> which dominates photocatalytic H<sub>2</sub> production. Fig. S13c is energy-dispersive X-ray spectroscopy (EDX) spectrum of Cu(3%)-TiO<sub>2</sub>/ErB-3mg and it reveals existence of Ti, O, Cu, C, I. Carbon and iodine elements are found in the picture due to existence of ErB. This could also illustrate by XPS spectra (Fig. S8).

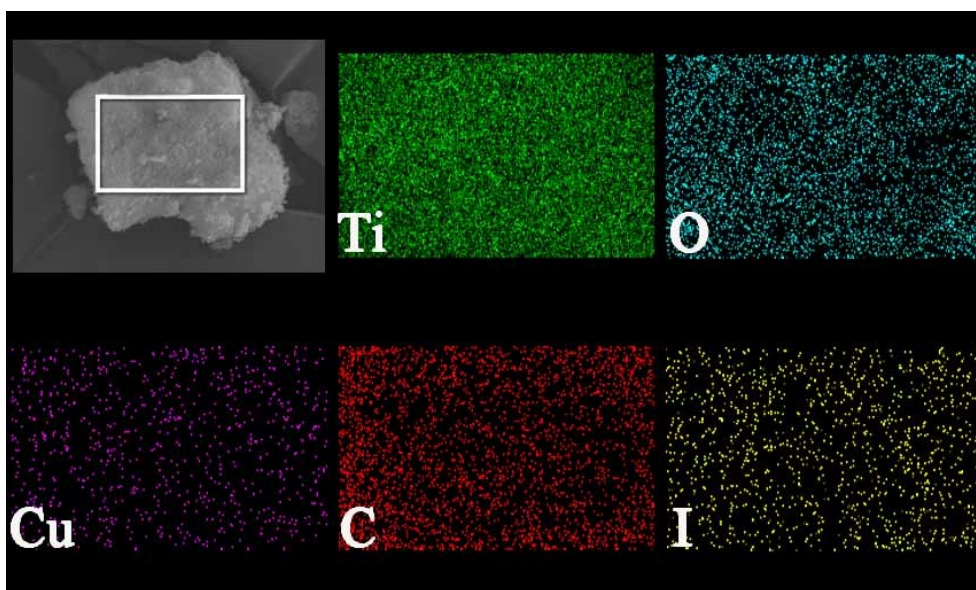

**Figure S14** Elemental mapping patterns of Cu(3%)-TiO<sub>2</sub>/ErB-3mg.

**Table S1** Surface element composition of Cu(3%)-TiO<sub>2</sub> determined by XPS.

| Sample                  | Elemental concentration ( atom% ) |       |       |
|-------------------------|-----------------------------------|-------|-------|
|                         | Ti 2p                             | O1s   | Cu 2p |
| Cu(3%)-TiO <sub>2</sub> | 31.91                             | 66.27 | 1.82  |

**Table S2** Surface element composition of Cu(3%)-TiO<sub>2</sub> before (1) and after (2) recycling photocatalytic reaction determined by XPS.

| Sample | Elemental concentration ( atom% ) |       |       |
|--------|-----------------------------------|-------|-------|
|        | Ti 2p                             | O1s   | Cu 2p |
| 1      | 31.91                             | 66.27 | 1.82  |
| 2      | 30.23                             | 68.16 | 1.61  |

**Table S3** Adsorption amount of ErB.

| Investment amount of ErB in experiment / mg | 1      | 3      | 5      | 10     | 15     |
|---------------------------------------------|--------|--------|--------|--------|--------|
| Adsorption amount of ErB / mg               | 0.1025 | 0.2018 | 0.2108 | 0.2201 | 0.2210 |

Adsorption amount of ErB increased with increase of ErB investment in experiment when investment amount of ErB under 5 mg. After investment amount of ErB more than 3 mg, adsorption amount of ErB increased not significantly or no increase, indicating adsorption of ErB reached saturation.

**Table S4** Surface element composition of Cu(3%)-TiO<sub>2</sub>/ErB-3mg before (1) and after (2) recycling tests determined by XPS.

| Sample | Elemental concentration ( atom% ) |       |       |      |      |
|--------|-----------------------------------|-------|-------|------|------|
|        | Ti 2p                             | O 1s  | Cu 2p | C 1s | I 3d |
| 1      | 28.89                             | 59.69 | 1.41  | 9.08 | 0.92 |
| 2      | 29.45                             | 61.34 | 1.29  | 7.15 | 0.77 |

I 3d and C 1s have some decline due to photobleaching of ErB. Other elements have few differences.

**Table S5** Apparent quantum efficiency (AQE) of photocatalysts [6].

| Potocatalysts                     | Apparent quantum efficiency (AQE) % |
|-----------------------------------|-------------------------------------|
| TiO <sub>2</sub>                  | 0.221                               |
| Cu(1%)-TiO <sub>2</sub>           | 0.657                               |
| Cu(2%)-TiO <sub>2</sub>           | 1.235                               |
| Cu(3%)-TiO <sub>2</sub>           | 2.315                               |
| Cu(4%)-TiO <sub>2</sub>           | 1.427                               |
| Cu(5%)-TiO <sub>2</sub>           | 0.492                               |
| Cu(3%)-TiO <sub>2</sub> /ErB-1mg  | 3.216                               |
| Cu(3%)-TiO <sub>2</sub> /ErB-3mg  | 4.673                               |
| Cu(3%)-TiO <sub>2</sub> /ErB-5mg  | 3.981                               |
| Cu(3%)-TiO <sub>2</sub> /ErB-10mg | 3.652                               |
| Cu(3%)-TiO <sub>2</sub> /ErB-15mg | 3.335                               |

The quantum efficiency is calculated from equation (1).

$$QE = \frac{2 \times \text{the number of evolved } H_2 \text{ molecules}}{\text{the number of incident photons } (N)} \times 100\% \quad (1)$$

N is determined by equation (2):

$$N = \frac{E\lambda}{hc}$$

Where E is the average intensity of irradiation which is determined by ILT 950 spectroradiometer (International Light Technologies),  $\lambda$  is wavelength,  $h$  is Planck constant and  $c$  is light speed.

## References

- [1] M.V. Dozzi, L. Prati, P. Canton and E. Selli, *Phys. Chem. Chem. Phys.*, 2009, **11**, 7171.
- [2] J.P. Huo and H.P. Zeng, *J. Mater. Chem. A*, 2015, **3**, 6258.

- [3] Z.Y. Li, Y.L. Fang, X.Q. Zhan and S.Xu, *J. Alloy Compd.*, 2013, **564**, 138.
- [4] X. Wang, Q. Wang, F. Li, W. Yang, Y. Zhao, Y. Hao and S. Liu, *Chem. Eng. J.*, 2013, 234, 361.
- [5] C. Pan, J. Xu, Y. Wang, D. Li and Y. Zhu, *Adv. Funct. Mater.*, 2012, **22**, 1518.
- [6] J. Liu, Y. Liu, N. Liu, Y. Han, X. Zhang and H. Huang, *Science*, 2015, **347**, 970.
